# Supplementary material for: Human RASSF7 regulates the microtubule cytoskeleton and is required for spindle formation, Aurora B activation and chromosomal congression during mitosis
Source: Oxford University Press journal article supplement (doi:10.1042/bj20100883), 2010-07-15
Supplement: bj4300207add.pdf [file bj4300207add.pdf]

SUPPLEMENTARY ONLINE DATA

**Human RASSF7 regulates the microtubule cytoskeleton and is required for spindle formation, Aurora B activation and chromosomal congression during mitosis**

Asha RECINO\*, Victoria SHERWOOD\*<sup>1</sup>, Amy FLAXMAN\*, Wendy N. COOPER†, Farida LATIF†, Andrew WARD\* and Andrew D. CHALMERS\*<sup>2</sup>

\*Centre for Regenerative Medicine, Department of Biology and Biochemistry, University of Bath, Bath BA2 7AY, U.K., and †Medical and Molecular Genetics, Institute of Biomedical Research, University of Birmingham, Edgbaston, Birmingham B15 2TT, U.K.

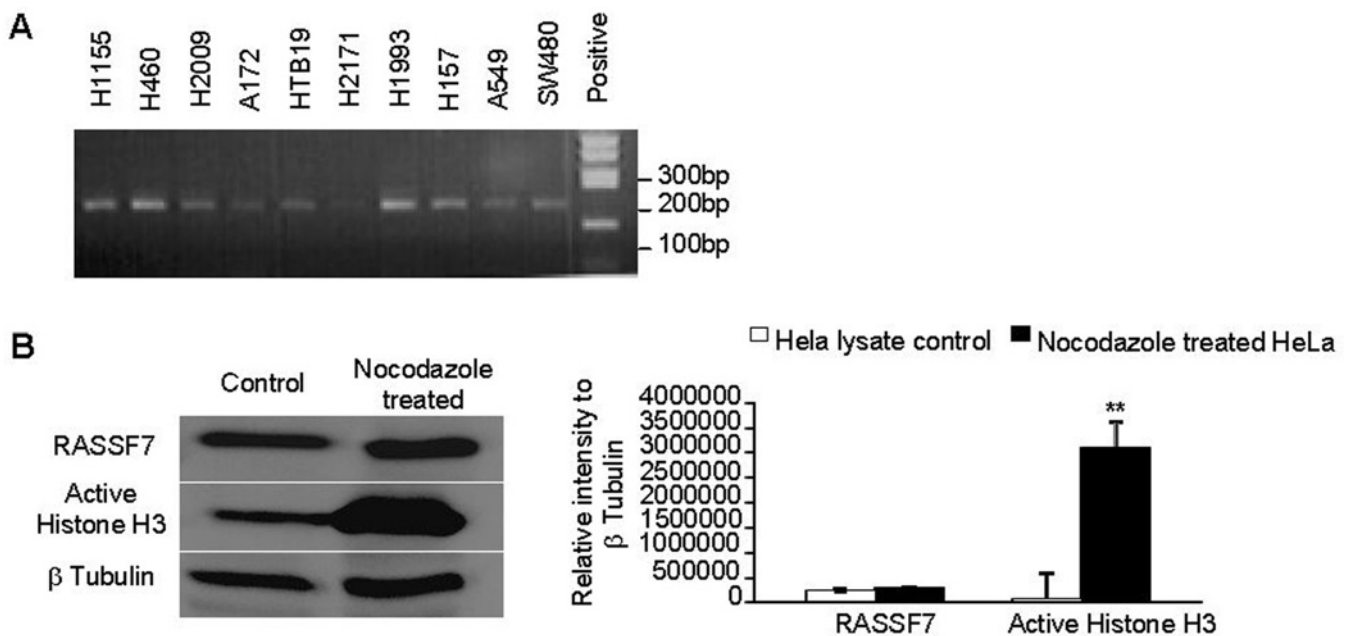

**Figure S1 Expression of RASSF7**

(A) Methylation of the *RASSF7* promoter. Analysis of the methylation status of the 5' CpG island associated with the *RASSF7* gene was carried out using COBRA (combined bisulfite restriction analysis). The full-length PCR product was 206 bp and complete digestion with BstUI would generate products less than 86 bp. Efficient enzyme activity is indicated by complete digestion of plasmid DNA (positive control). No methylation was observed in any of the cancer cell lines analysed (20 lung, 12 breast, eight colorectal, eight kidney, five glioma and four neuroblastoma). Data from ten cell lines are presented. Sequencing of samples identified the correct PCR product and confirmed the unmethylated state. (B) Expression of RASSF7 protein in mitosis. HeLa cell lysates were enriched with M-phase cells through nocodazole treatment (75 ng/ml) for 18 h followed by mitotic shake off. There was no significant change in RASSF7 protein expression levels. Expression of the positive control, active histone H3 expression, increased as expected. \*\* $P < 0.01$  compared with corresponding controls.

<sup>1</sup> Present address: Cell and Experimental Pathology, Lund University, Malmö University Hospital, S-205 02 Malmö, Sweden

<sup>2</sup> To whom correspondence should be addressed (email ac270@bath.ac.uk).

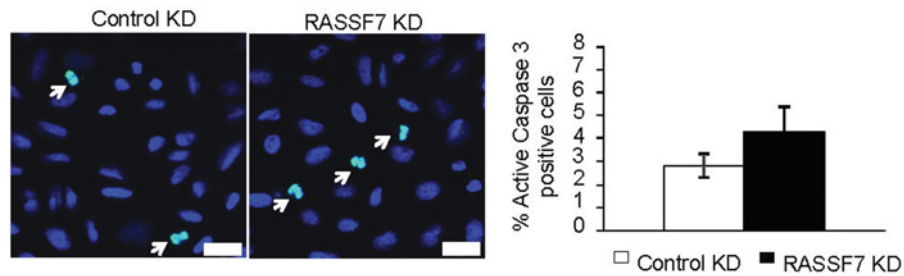

**Figure S2** *RASSF7* knockdown did not cause a significant increase in apoptosis

*RASSF7* depletion in HeLa cells did not significantly increase the number of active caspase 3-positive cells (green, highlighted by arrows) compared with controls. More than 500 cells were counted for each sample from three independent experiments. Blue shows nuclear staining. Scale bar, 20  $\mu$ m.

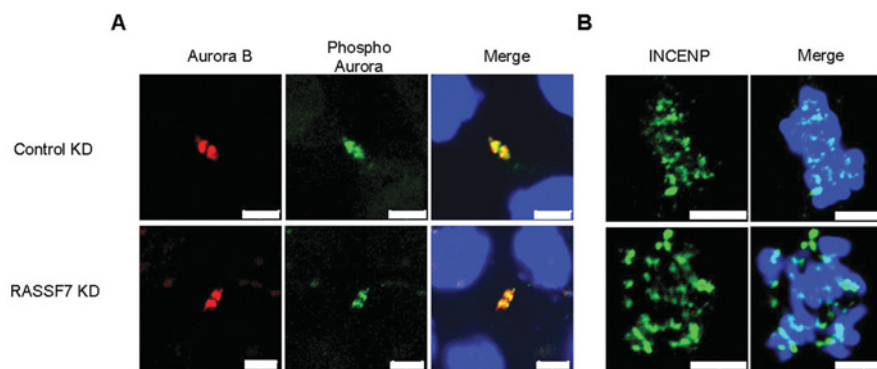

**Figure S3** Aurora B activity during mitosis

(A) Aurora B phosphorylation appears normal during cytokinesis in *RASSF7*-knockdown HeLa cells. (B) INCENP (green), which is required for Aurora B activation, maintains its correct localization during metaphase in *RASSF7*-knockdown HeLa cells. Blue shows nuclear staining. Scale bar, 5  $\mu$ m.

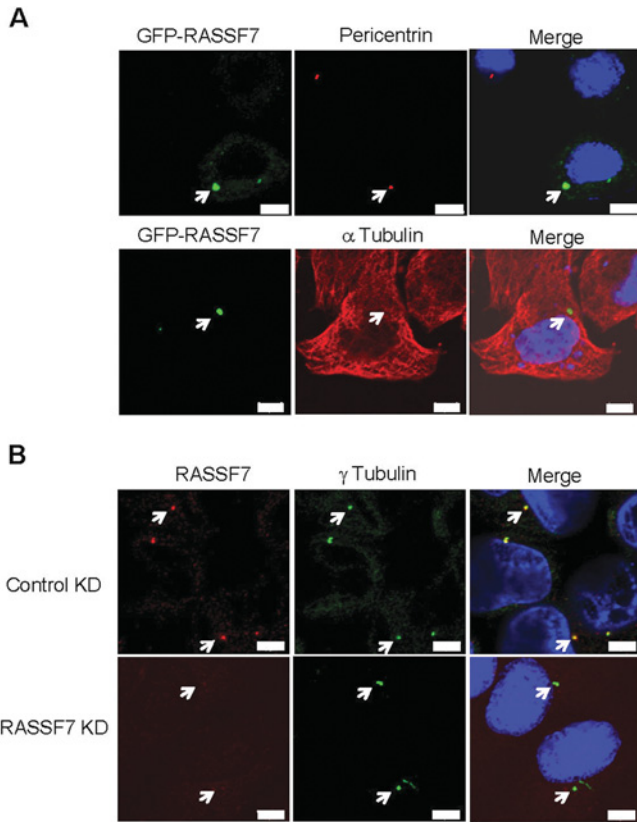

**Figure S4 Localization of RASSF7**

(A) A GFP-RASSF7 fusion protein localizes to the centrosomes (arrows), marked with pericentrin, when expressed at low levels in HeLa cells. When expressed at high levels, GFP-RASSF7 formed large aggregates (results not shown). We did not see any stabilization of microtubules by RASSF7 (high or low levels), reminiscent of the striking phenotype seen after expressing RASSF1A. (B) The endogenous centrosomal RASSF7 staining is lost in *RASSF7*-knockdown HeLa cells (arrows). Blue shows nuclear staining. Scale bar, 5  $\mu$ m.

Received 17 June 2010/9 July 2010; accepted 14 July 2010  
 Published as BJ Immediate Publication 14 July 2010, doi:10.1042/BJ20100883
